# Supplementary material for: Facile Synthesis of BiVO4@ZIF−8 Composite with Heterojunction Structure for Photocatalytic Wastewater Treatment
Source: MDPI journal article supplement (doi:10.3390/ma14237424), 2021-12-03
Supplement: s1 [file s1]

## Supplementary Materials

Supplementary Materials sections were cited in the main text as Figures S1 and S2, Tables S1 and S2.

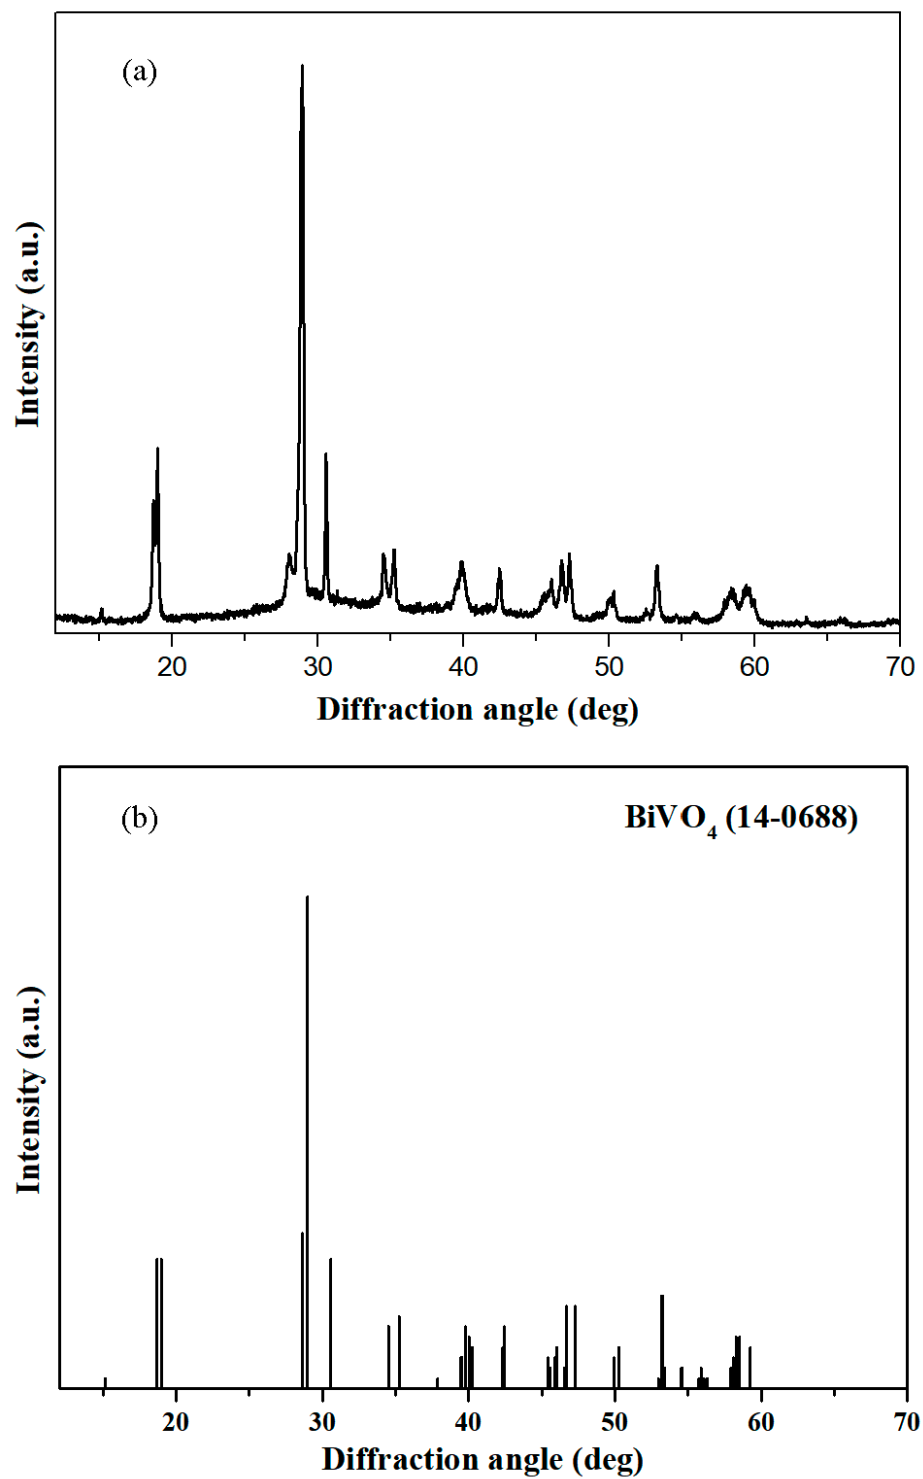

**Figure S1.** The XRD pattern (a) and the standard PDF card (b) of pure  $\text{BiVO}_4$ .

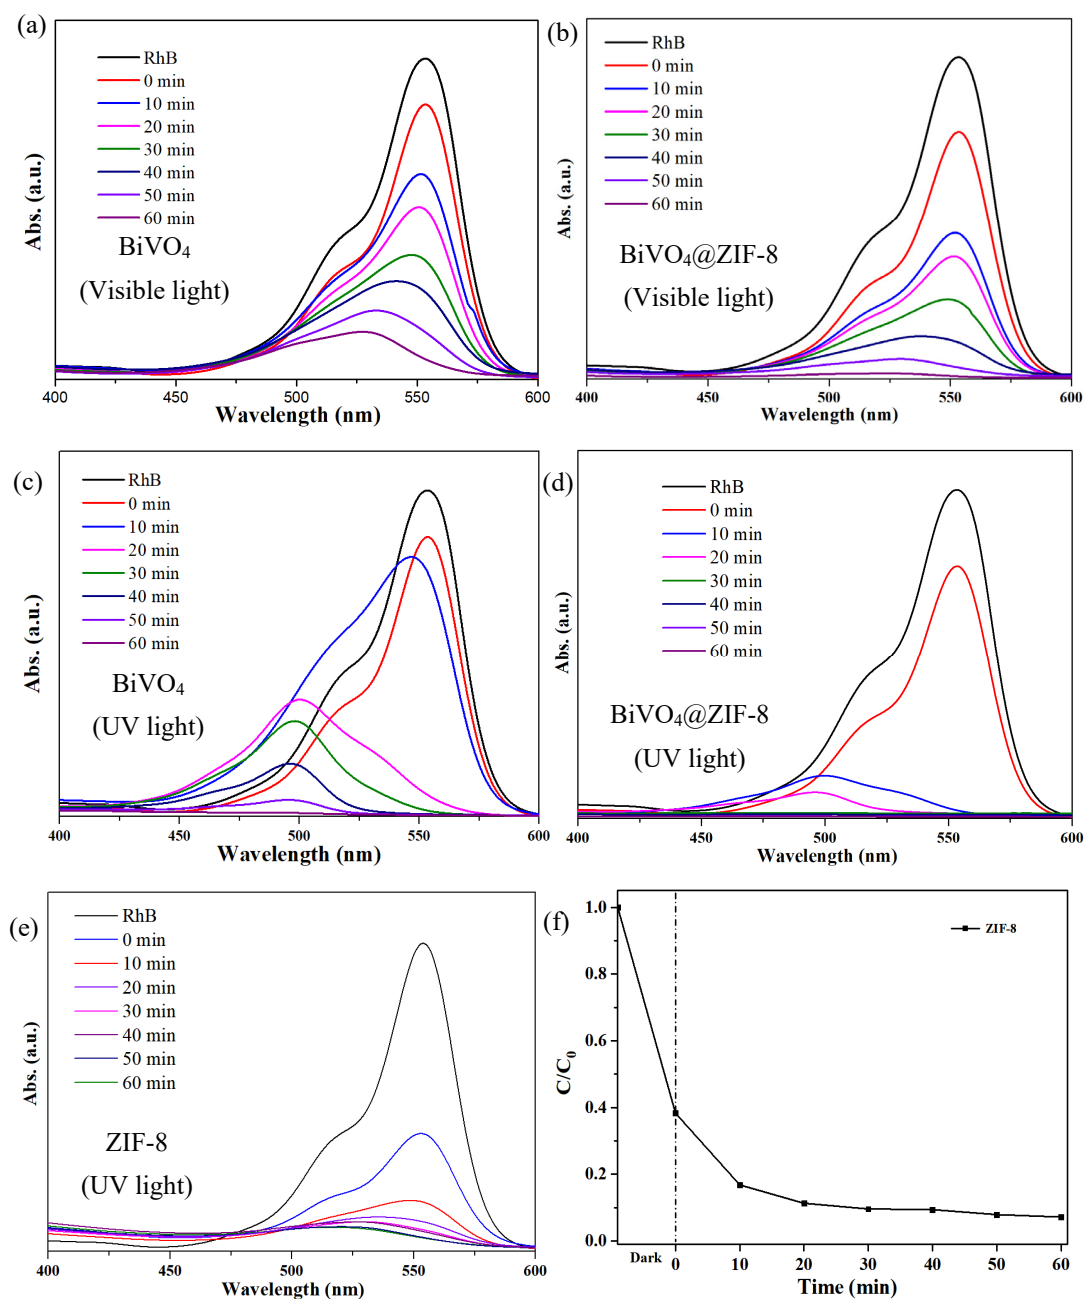

**Figure S2.** The light absorption spectra of RhB solution after photo-degraded by  $\text{BiVO}_4$  (a) and  $\text{BiVO}_4@\text{ZIF-8}$  (b) in visible light;  $\text{BiVO}_4$  (c),  $\text{BiVO}_4@\text{ZIF-8}$  (d) and pure ZIF-8 (e) in UV light; (f) The photo degradation efficiency of pure ZIF-8 under UV light.

**Table S1.** The performances of photocatalysts based on different BiVO<sub>4</sub> composite materials.

| Photocatalyst                           | Morphology                | Efficiency * | Ref.      |
|-----------------------------------------|---------------------------|--------------|-----------|
| Monoclinic-BiVO <sub>4</sub>            | Nanorods                  | 60           | [1]       |
| Ag <sub>2</sub> O@BiVO <sub>4</sub>     | Nanofiber                 | 60           | [2]       |
| BiVO <sub>6</sub> @TiO <sub>2</sub>     | Heterojunction structures | 180          | [3]       |
| AgNO <sub>3</sub> @BiVO <sub>4</sub>    | Dendritic-like            | 20           | [4]       |
| BiVO <sub>4</sub>                       | Mesoporous                | 180          | [5]       |
| CdS@BiVO <sub>4</sub>                   | Hollow cubes              | 50           | [6]       |
| ZnO@MoS <sub>2</sub> @BiVO <sub>4</sub> | Heterojunction structures | >180         | [7]       |
| ZIF-8@BiVO <sub>4</sub>                 | Hierarchical structures   | 20           | This work |

\* Time needed (minutes) for 90% degradation.

**Table S2.** The performances of photocatalysts based on different MOF composite materials.

| Photocatalyst                             | Morphology              | Efficiency *       | Ref.      |
|-------------------------------------------|-------------------------|--------------------|-----------|
| ZnO/CdS@ZIF-8                             | Nanorods                | >120               | [8]       |
| ZIF-8@Zn <sub>1-x</sub> Ni <sub>x</sub> O | Nanoboxes               | 15                 | [9]       |
| Mn <sub>3</sub> O <sub>4</sub> @ZIF-8     | Nanoparticles           | 30                 | [10]      |
| Bi <sub>2</sub> S <sub>3</sub> @ZIF-8     | Nanorods                | 50 (Visible light) | [11]      |
| Bi <sub>2</sub> MoO <sub>6</sub> @ZIF-8   | Mesoporous ball         | >100               | [12]      |
| ZIF-8@g-C <sub>3</sub> N <sub>4</sub>     | Nanoparticles           | 30                 | [13]      |
| ZIF-8@BiVO <sub>4</sub>                   | Hierarchical structures | 20                 | This work |

\* Time needed (minutes) for 90% degradation.

## References

1. Y. Lin, C. Lu, C. Wei, Microstructure and photocatalytic performance of BiVO<sub>4</sub> prepared by hydrothermal method, *Journal of Alloys and Compounds*, 781 (2019) 56-63.
2. J. Ren, Y. Zhu, Ag<sub>2</sub>O-decorated electrospun BiVO<sub>4</sub> nanofibers with enhanced photocatalytic performance, *RSC Advances*, 10 (2020) 6114-6120.
3. C. Ma, M. Wei, BiVO<sub>4</sub>-nanorod-decorated rutile/anatase TiO<sub>2</sub> nanofibers with enhanced photoelectrochemical performance, *Materials Letters*, 259 (2020) 126849.
4. M. Wang, W. Lu, D. Chen, J. Liu, B. Hu, L. Jin, Y. Lin, D. Yue, J. Huang, Z. Wang, Synthesis of dendritic-like BiVO<sub>4</sub>:Ag heterostructure for enhanced and fast photocatalytic degradation of RhB solution, *Materials Research Bulletin*, 84 (2016) 414-421.
5. W. He, X. Zhang, X. Dong, X. Zhang, C. Ma, H. Ma, Preparation of Mesoporous BiVO<sub>4</sub> for Efficient Photocatalytic Degradation of RhB Under Illuminated Visible Light, *Journal of Advanced Oxidation Technologies*, 17 (2014) 33-38.
6. Y. Lin, D. Pan, H. Luo, Hollow direct Z-Scheme CdS/BiVO<sub>4</sub> composite with boosted photocatalytic performance for RhB degradation and hydrogen production, *Materials Science in Semiconductor Processing*, 121 (2021) 105453.
7. M.B. Tahir, F. Shafiq, M. Sagir, M.S. Tahir, Construction of visible-light-driven ternary ZnO-MoS<sub>2</sub>-BiVO<sub>4</sub> composites for enhanced photocatalytic activity, *Applied Nanoscience*, 11 (2021) 241-247.
8. R.-M. Kong, Y. Zhao, Y. Zheng, F. Qu, Facile synthesis of ZnO/CdS@ZIF-8 core-shell nanocomposites and their applications in photocatalytic degradation of organic dyes, *RSC Advances*, 7 (2017) 31365-31371.
9. Y. Jing, J. Wang, B. Yu, J. Lun, Y. Cheng, B. Xiong, Q. Lei, Y. Yang, L. Chen, M. Zhao, A MOF-derived ZIF-8@Zn<sub>1-x</sub>Ni<sub>x</sub>O photocatalyst with enhanced photocatalytic activity, *RSC Advances*, 7 (2017) 42030-42035.
10. L. Hu, G. Deng, W. Lu, Y. Lu, Y. Zhang, Peroxymonosulfate activation by Mn<sub>3</sub>O<sub>4</sub>/metal-organic framework for degradation of refractory aqueous organic pollutant rhodamine B, *Chinese Journal of Catalysis*, 38 (2017) 1360-1372.
11. Y.-H. Ding, X.-L. Zhang, N. Zhang, J.-Y. Zhang, R. Zhang, Y.-F. Liu, Y.-Z. Fang, A visible-light driven Bi<sub>2</sub>S<sub>3</sub>@ZIF-8 core-shell heterostructure and synergistic photocatalysis mechanism, *Dalton Transactions*, 47 (2018) 684-692.
12. Y. Xia, S.-k. Shang, X.-r. Zeng, J. Zhou, Y.-y. Li, A Novel Bi<sub>2</sub>MoO<sub>6</sub>/ZIF-8 Composite for Enhanced Visible Light Photocatalytic Activity, *Nanomaterials*, 9 (2019).
13. X. Liu, J. Zhang, Y. Dong, H. Li, Y. Xia, H. Wang, A facile approach for the synthesis of Z-scheme photocatalyst ZIF-8/g-C<sub>3</sub>N<sub>4</sub> with highly enhanced photocatalytic activity under simulated sunlight, *New Journal of Chemistry*, 42 (2018) 12180-12187.
